# Supplementary material
Source: publisher site journal article supplement (https://www.spandidos-publications.com/5924/downloadSupplementary)

Figure S1. Plasmid backbone. (A) The overexpression plasmid backbone of RPS15A. (B) The overexpression plasmid backbone of ADAM17.

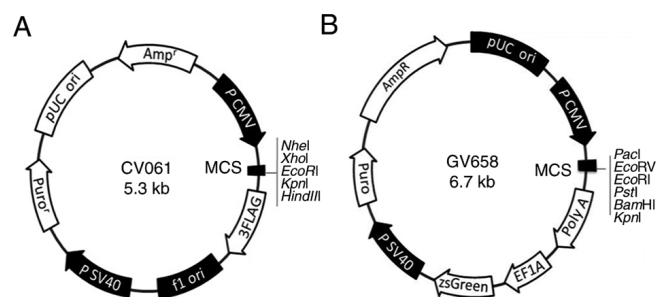

Figure S2. Verification of transfection efficiency. (A and B) The efficiency of transfection with shRNAs in FaDu cells was verified by RT-qPCR and western blotting. (C and D) The efficiency of transfection with shRNAs in Tu686 cells was verified by RT-qPCR and western blotting. \*\*P<0.01. shRNAs, short hairpin RNAs; RT-qPCR, reverse transcription quantitative PCR.

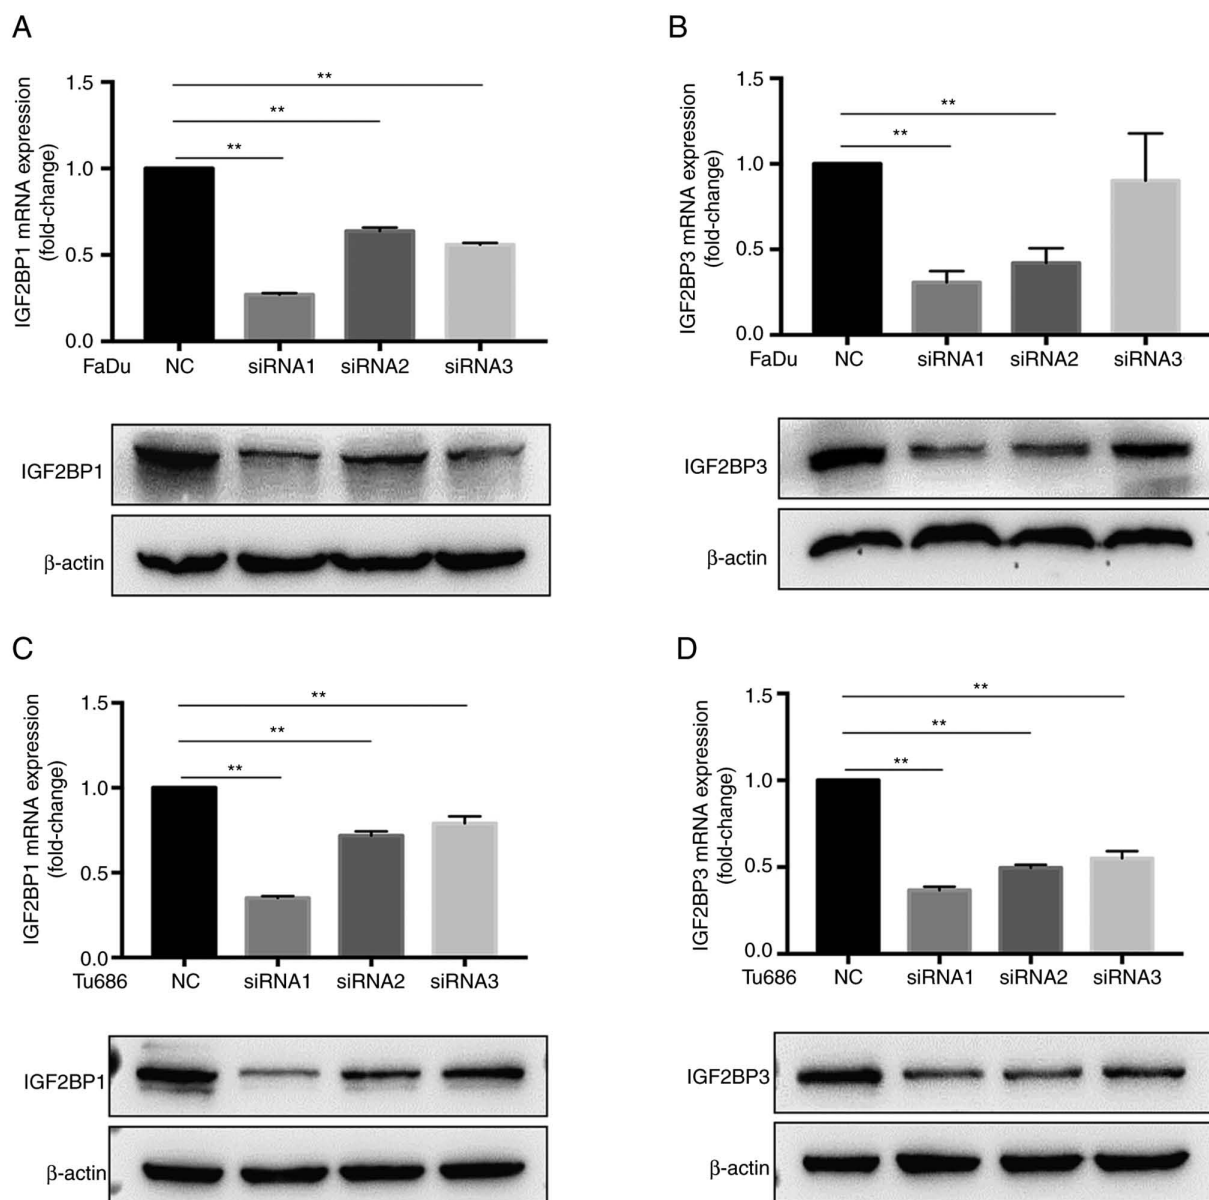

Supplement: Supplementary file 1 [file downloadSupplementary]
